# Supplementary material for: Uptake and translocation mechanisms of different forms of organic selenium in rice (Oryza sativa L.)
Source: Front Plant Sci. 2022 Aug 22;13:970480. doi: 10.3389/fpls.2022.970480 (PMC9441932; doi:10.3389/fpls.2022.970480)
Supplement: Supplementary file 1 [file Data_Sheet_1.xls]

## Sheet: caption
									Uptake and translocation mechanisms of different forms of organic selenium in rice (Oryza sativa L.)
									Qi Wang1, Lingxuan Kong1, Qingqing Huang2, Huafen Li1, Yanan Wan1*
(1Beijing Key Laboratory of Farmland Soil Pollution Prevention and Remediation, Key Laboratory of Plant-Soil Interactions of the Ministry of Education, China Agricultural University, Beijing 100193, People’s Republic of China; 2Innovation Team of Remediation of Heavy Metal-Contaminated Farmlands, Agro-Environmental Protection Institute, Ministry of Agriculture and Rural Affairs, Tianjin 300191, P…

## Sheet: Con.-dependent Kinetics
			No.	weight (g)	con. (ug/L)	C*1.25	Dilution ratio		uptake rate (nmol g-1 root h-1 )
			blank		0.01
			Se6 0.1-1	0.2501	1.70891	2.13614		2.12614	5.38047
			Se6 0.1-2	0.2503	1.81504	2.2688		2.2588	5.71162
			Se6 0.1-3	0.2504	1.89141	2.36426		2.35426	5.95063
			Se6 0.5-1	0.2509	1.72641	2.15802		2.14802	5.41851
			Se6 0.5-2	0.2503	1.74348	2.17935		2.16935	5.48545
			Se6 0.5-3	0.2506	1.91169	2.38961		2.37961	6.0099
			Se6 1-1	0.2505	2.43022	3.03778		3.02778	7.64996
			Se6 1-2	0.2503	3.03862	3.79828		3.78828	9.57909
			Se6 1-3	0.2505	3.55366	4.44207		4.43208	11.198
			Se6 5-1	0.2508	5.42905	6.78631		6.77631	17.1005
			Se6 5-2	0.251	5.45144	6.8143		6.8043	17.1574
			Se6 5-3	0.2505	6.09587	7.61984		7.60984	19.227
			Se6 10-1	0.2501	8.71708	10.8964		10.8864	27.5494
			Se6 10-2	0.2503	7.25345	9.06681		9.05681	22.9012
			Se6 10-3	0.2503	9.0405	11.3006		11.2906	28.5496
			Se6 20-1	0.2507	14.3662	17.9578		17.9478	45.3105
			Se6 20-2	0.2508	13.8397	17.2996		17.2896	43.6315
			Se6 20-3	0.2507	16.142	20.1776		20.1676	50.9145
			SeOMet 0.1-1	0.2505	3.06379	3.82974		3.81974	9.65091
			SeOMet 0.1-2	0.2501	3.17969	3.97461		3.96461	10.033
			SeOMet 0.1-3	0.2506	2.74365	3.42956		3.41956	8.63639
			SeOMet 0.5-1	0.2502	6.09952	7.6244		7.6144	19.2616
			SeOMet 0.5-2	0.2502	5.99164	7.48955		7.47955	18.9204
			SeOMet 0.5-3	0.2501	6.72375	8.40469		8.39469	21.2439
			SeOMet 1-1	0.2507	13.3363	16.6704		16.6604	42.0604
			SeOMet 1-2	0.2503	14.3006	17.8757		17.8657	45.1754
			SeOMet 1-3	0.251	13.0151	16.2689		16.2589	40.9978
			SeOMet 5-1	0.2509	18.0901	22.6126		22.6026	57.0165
			SeOMet 5-2	0.2504	22.88	28.6001		28.5901	72.2643
			SeOMet 5-3	0.2505	27.2847	34.1058		34.0958	86.1463
			SeOMet 10-1	0.25	35.2372	44.0465		44.0365	111.485
			SeOMet 10-2	0.2504	31.2628	39.0785		39.0685	98.7496
			SeOMet 10-3	0.2501	45.932	57.4151		57.4051	145.271
			SeOMet 20-1	0.2506	62.8033	78.5041		78.4941	198.244
			SeOMet 20-2	0.2504	68.0125	85.0157		85.0057	214.86
			SeOMet 20-3	0.2506	71.4419	89.3024		89.2924	225.516
			SeMet 0.1-1	0.2507	6.3918	7.98975		7.97975	20.1455
			SeMet 0.1-2	0.2504	4.94341	6.17926		6.16926	15.5934
			SeMet 0.1-3	0.2507	4.90424	6.1303		6.1203	15.4512
			SeMet 0.5-1	0.2503	15.2964	19.1204		19.1104	48.3229
			SeMet 0.5-2	0.2504	19.3123	24.1404		24.1303	60.9919
			SeMet 0.5-3	0.2508	15.0988	18.8735		18.8635	47.6033
			SeMet 1-1	0.2503	41.6281	52.0352		52.0252	131.551
			SeMet 1-2	0.2504	61.1521	76.4401		76.4301	193.185
			SeMet 1-3	0.2509	48.2473	60.3091		60.2991	152.108
			SeMet 5-1	0.2509	85.1333	106.417		106.407	268.417
			SeMet 5-2	0.2505	82.2502	102.813		102.803	259.741
			SeMet 5-3	0.2502	91.7933	114.742		114.732	290.228
			SeMet 10-1	0.25	53.7663	134.416	2	134.406	340.268
			SeMet 10-2	0.2505	78.5523	196.381	2	196.371	496.149
			SeMet 10-3	0.2503	68.0101	170.025	2	170.015	429.903
			SeMet 20-1	0.2501	23.9138	298.923	10	298.913	756.439
			SeMet 20-2	0.2503	25.1223	314.028	10	314.018	794.03
			SeMet 20-3	0.2503	20.39	254.875	10	254.865	644.454
			Se4 0.1-1	0.2502	3.89087	4.86358		4.85358	12.2777
			Se4 0.1-2	0.2504	3.86548	4.83185		4.82185	12.1877
			Se4 0.1-3	0.2502	4.4159	5.51987		5.50987	13.9379
			Se4 0.5-1	0.251	7.73187	9.66484		9.65484	24.3452
			Se4 0.5-2	0.25	9.33263	11.6658		11.6558	29.5083
			Se4 0.5-3	0.2505	6.76474	8.45593		8.44593	21.3394
			Se4 1-1	0.2508	10.8054	13.5067		13.4967	34.06
			Se4 1-2	0.25	13.9364	17.4205		17.4105	44.0772
			Se4 1-3	0.2506	14.1284	17.6605		17.6505	44.5779
			Se4 5-1	0.2502	12.8282	32.0705	2	32.0605	81.1009
			Se4 5-2	0.2508	14.1143	35.2857	2	35.2757	89.0207
			Se4 5-3	0.2505	13.6963	34.2407	2	34.2307	86.4869
			Se4 10-1	0.2503	18.1561	45.3902	2	45.3802	114.749
			Se4 10-2	0.2508	20.1362	50.3406	2	50.3306	127.013
			Se4 10-3	0.2505	18.3871	45.9677	2	45.9577	116.116
			Se4 20-1	0.2503	27.083	67.7074	2	67.6974	171.181
			Se4 20-2	0.25	28.0634	70.1586	2	70.1486	177.591
			Se4 20-3	0.2503	24.3413	60.8533	2	60.8434	153.849

## Sheet: time-dependent Kinetics
						fw	dw
		No.	weight (g)	con. (ug/L)	C*1.25	con.(mg/kg）	con.(mg/kg）
	1	Blank-1		0.618156	0.772695
	2	Blank-2		0.476665	0.595832	0.569823
	3	Blank-3		0.435051	0.543813
	7	SeMet-Root 1—1	0.2729	13.647	17.0587	3.02102	25.1752
	8	1—2	0.2416	7.28861	9.11076	1.76754	14.7295
	9	1—3	0.2589	16.0684	20.0855	3.76892	31.4077
	10	3—1	0.2992	30.6511	38.3138	6.30746	52.5622
	11	3—3	0.3265	28.3248	35.406	5.33476	44.4564
	12	3—2	0.3129	39.5911	49.4889	7.81702	65.1418
	13	5—1	0.267	37.7117	47.1397	8.72091	72.6742
	14	5—3	0.3042	27.3853	34.2316	5.53281	46.1067
	15	5—2	0.307	22.8337	28.5421	4.55572	37.9643
	16	18—1	0.2768	47.3879	59.2348	10.597	88.3081
	17	18—2	0.3097	70.9281	88.6602	14.2219	118.515
	18	18—3	0.3232	79.6262	99.5327	15.3098	127.582
	19	26—1	0.2557	57.4573	71.8217	13.9327	116.106
	20	26—2	0.2978	59.8098	74.7622	12.4567	103.806
	21	26—3	0.2657	86.6595	108.324	20.2775	168.979
	22	48—1	0.2611	82.9422	103.678	19.7449	164.541
	23	48—2	0.297	83.2449	104.056	17.4219	145.183
	24	48—3	0.3746	86.9824	108.728	14.4365	120.304
	25	72—1	0.3445	68.9422	86.1778	12.4249	103.541
	26	72—2	0.3072	79.1351	98.9189	16.0073	133.394
	27	72—3	0.3644	135.66	169.575	23.1895	193.246
	28	SeOMet-Root 1—1	0.3358	1.49787	1.87234	0.193916	1.61597
	29	1—2	0.273	1.7068	2.1335	0.286355	2.38629
	30	1—3	0.3353	2.89417	3.61771	0.454476	3.7873
	31	3—1	0.345	9.34386	11.6798	1.61012	13.4177
	32	3—2	0.3141	6.8425	8.55312	1.27079	10.5899
	33	3—3	0.3147	6.41801	8.02251	1.18407	9.86721
	34	5—1	0.3613	9.2221	11.5276	1.51642	12.6368
	35	5—2	0.3699	12.0026	15.0033	1.95097	16.2581
	36	5—3	0.3215	9.6108	12.0135	1.7797	14.8309
						fw	dw
		No.	weight (g)	con. (ug/L)	C*1.25	con.(mg/kg）	con.(mg/kg）
	1	Blank-1		0.41294	0.516174	0.55265
	2	Blank-2		0.411636	0.514545
	3	Blank-3		0.501785	0.627231
	7	SeOMet-Root 18—1	0.374	25.0254	31.2818	4.10852	34.2377
	8	18—2	0.2978	29.7255	37.1569	6.14623	51.2186
	9	18—3	0.3883	35.9864	44.9831	5.72149	47.6791
	10	26—1	0.3446	34.2257	42.7822	6.12771	51.0643
	11	26—2	0.3202	26.1822	32.7277	5.02462	41.8719
	12	26—3	0.3368	30.6388	38.2984	5.60398	46.6999
	13	48—1	0.3376	59.5339	74.4174	10.9401	91.1674
	14	48—2	0.3373	81.6693	102.087	15.0514	125.428
	15	48—3	0.2886	55.9251	69.9064	12.016	100.133
	16	72—1	0.3086	77.625	97.0312	15.6321	130.267
	17	72—2	0.3114	61.4496	76.812	12.245	102.042
	18	72—3	0.3715	79.5874	99.4843	13.3155	110.963
	19	SeMet-Shoot 1—1	0.2929	1.23536	1.5442	0.169716	0.942869
	20	1—3	0.3137	1.15729	1.44662	0.14291	0.793945
	21	1—2	0.2679	5.41485	6.76857	1.16061	6.44785
	22	3—1	0.255	1.40759	1.75948	0.237153	1.31752
	23	3—3	0.2609	1.25025	1.56281	0.1941	1.07833
	24	3—2	0.3749	1.05496	1.3187	0.102521	0.56956
	25	5—1	0.2951	3.68337	4.60421	0.686921	3.81623
	26	5—2	0.3193	1.62523	2.03154	0.231999	1.28888
	27	5—3	0.3216	2.10967	2.63709	0.324486	1.8027
	28	18—1	0.3359	2.62299	3.27874	0.406183	2.25657
	29	18—2	0.2946	2.71143	3.38929	0.481889	2.67716
	30	18—3	0.3274	4.00746	5.00933	0.681021	3.78345
	31	26—1	0.2854	6.27	7.8375	1.27672	7.09287
	32	26—2	0.2883	8.33872	10.4234	1.71235	9.51304
	33	26—3	0.31	3.99697	4.99621	0.717131	3.98406
	34	48—1	0.2744	20.4934	25.6168	4.56757	25.3754
	35	48—2	0.2896	15.0036	18.7544	3.14303	17.4613
	36	48—3	0.2988	15.0193	18.7741	3.04954	16.9419
	37	72—1	0.3045	27.1127	33.8909	5.4747	30.415
	38	72—2	0.2974	23.882	29.8525	4.92645	27.3692
	39	72—3	0.3767	22.7397	28.4246	3.69985	20.5547
						fw	dw
		No.	weight (g)	con. (ug/L)	C*1.25	con.(mg/kg）	con.(mg/kg）
	1	Blank-1		0.437908	0.547386	0.577343
	2	Blank-2		0.478922	0.598652
	3	Blank-3		0.468794	0.585992
	7	SeOMet-Shoot 1—1	0.2651	0.737987	0.922483	0.0645951	0.358862
	8	1—2	0.2874	0.596296	0.74537	0.0287699	0.159833
	9	1—3	0.3157	0.648239	0.810299	0.0364743	0.202635
	10	3—1	0.3378	0.71728	0.896599	0.046862	0.260344
	11	3—2	0.3008	0.918485	1.14811	0.0944325	0.524625
	12	3—3	0.3124	0.741145	0.926432	0.0554468	0.308038
	13	5—1	0.2948	0.867394	1.08424	0.0855228	0.475126
	14	5—2	0.3448	1.20733	1.50917	0.13474	0.748554
	15	5—3	0.3426	3.42129	1.3812	0.116929	0.649608
	16	18—1	0.3462	1.03216	1.2902	0.102571	0.569839
	17	18—2	0.2937	1.26374	1.57967	0.170186	0.945478
	18	18—3	0.3246	1.34702	1.68377	0.17002	0.944558
	19	26—1	0.3204	2.27332	2.84166	0.352942	1.96079
	20	26—2	0.3256	2.86471	3.58088	0.460824	2.56013
	21	26—3	0.3368	4.34544	5.4318	0.72028	4.00155
	22	48—1	0.3136	19.2339	24.0424	3.74081	20.7823
	23	48—2	0.3049	14.5213	18.1516	2.88153	16.0085
	24	48—3	0.3441	12.9485	16.1856	2.2676	12.5978
	25	72—1	0.3498	44.5391	55.6739	7.87505	43.7503
	26	72—2	0.3721	23.1377	28.9221	3.8084	21.1578
	27	72—3	0.2997	35.1367	43.9208	7.2307	40.1706
			mg/kg	g	μg	mg/kg	g	μg	μg Se/g root (DW)
		Met	Root	biomass	r-Total	Shoot	biomass	S-Total	uptake rate
		1—1	25.1752	0.4308	10.8455	0.942869	1.1736	1.10655	27.7438
		1—2	14.7295	0.4812	7.08785	0.793945	1.2636	1.00323	16.8144
		1—3	31.4077	0.6864	21.5582	0.868407	1.836	1.59439	33.7305
		3—1	52.5622	0.5244	27.5636	1.31752	1.5426	2.0324	56.4378
		3—2	44.4564	0.5436	24.1665	1.07833	1.5408	1.6615	47.5128
		3—3	48.5093	0.81	39.2925	1.19793	1.7838	2.13686	51.1474
		5—1	72.6742	0.6924	50.3196	3.81623	1.719	6.5601	82.1487
		5—2	46.1067	0.8076	37.2358	1.28888	1.7514	2.25735	48.9019
		5—3	59.3905	0.6504	38.6276	1.8027	1.5372	2.77111	63.6511
		18—1	88.3081	0.8088	71.4236	2.25657	1.9746	4.45583	93.8173
		18—2	118.515	0.6936	82.2023	2.67716	1.5372	4.11533	124.449
		18—3	127.582	0.5772	73.6403	3.78345	1.4922	5.64567	137.363
		26—1	116.106	0.726	84.2926	7.09287	1.6956	12.0267	132.671
		26—2	103.806	0.7812	81.0932	9.51304	1.6848	16.0276	124.323
		26—3	168.979	0.7812	132.006	3.98406	2.007	7.99601	179.214
		48—1	164.541	0.75	123.406	25.3754	1.5822	40.1489	218.073
		48—2	145.183	0.618	89.7229	17.4613	1.4346	25.05	185.717
		48—3	120.304	0.7512	90.3723	16.9419	1.6254	27.5374	156.962
		72—1	103.541	1.0092	104.494	30.415	2.0034	60.9334	163.919
		72—2	133.394	0.768	102.447	27.3692	1.6164	44.2395	190.998
		72—3	193.246	0.8976	173.457	20.5547	2.2104	45.4341	243.863
			mg/kg	g	μg	mg/kg	g	μg	μg Se/g root (DW)
		OMet	Root	biomass	r-Total	Shoot	biomass	S-Total	uptake rate
		1—1	1.61597	0.5352	0.864866	0.358862	1.503	0.539369	27.7438
		1—2	2.38629	0.5652	1.34873	0.159833	1.4814	0.236777	16.8144
		1—3	3.7873	0.5352	2.02696	0.202635	1.5768	0.319515	33.7305
		3—1	13.4177	0.4776	6.40828	0.260344	1.53	0.398327	56.4378
		3—2	10.5899	0.4044	4.28257	0.524625	1.0548	0.553375	47.5128
		3—3	9.86721	0.5076	5.0086	0.308038	1.4112	0.434703	51.1474
		5—1	12.6368	0.564	7.12715	0.475126	1.26	0.598659	82.1487
		5—2	16.2581	0.54	8.77936	0.748554	1.1376	0.851555	48.9019
		5—3	14.8309	0.744	11.0342	0.649608	2.124	1.37977	63.6511
		18—1	34.2377	0.7224	24.7333	0.569839	1.7766	1.01238	93.8173
		18—2	51.2186	0.4956	25.3839	0.945478	1.2366	1.16918	124.449
		18—3	47.6791	0.6276	29.9234	0.944558	1.4778	1.39587	137.363
		26—1	51.0643	0.6024	30.7611	1.96079	1.6614	3.25766	132.671
		26—2	41.8719	0.6276	26.2788	2.56013	2.1636	5.5391	124.323
		26—3	46.6999	0.7968	37.2105	4.00155	1.6956	6.78504	179.214
		48—1	91.1674	0.8208	74.8302	20.7823	1.7154	35.6499	218.073
		48—2	125.428	0.882	110.628	16.0085	1.7748	28.4119	185.717
		48—3	100.133	0.882	88.3176	12.5978	2.0844	26.2589	156.962
		72—1	130.267	0.9936	129.434	43.7503	1.4202	62.1342	163.919
		72—2	102.042	0.7824	79.8375	21.1578	1.7298	36.5987	190.998
		72—3	110.963	0.7164	79.4936	40.1706	1.3896	55.821	243.863

## Sheet: Inhibitor
												第二批
			No.	weight (g)	con.(μg/L)	*1.25	con.(mg/kg）					编号	No.		weight (g)	con.(μg/L)	*1.25	con.(mg/kg）
		1	Blank-1		0.464599	0.580749	0.247181					1	Blank-1			0.118177	0.147722	0.145798
		2	Blank-2		0.213076	0.266345						2	Blank-2			0.130171	0.162714
		3	Blank-3		0.182413	0.228017						3	Blank-3			0.101566	0.126958
	SeMet	7	CK1-Root	0.2501	77.8177	97.2721	19.3972				SeOMet	7	CK1-Root		0.2506	9.06418	11.3302	2.23153
		8	CK2-Root	0.2504	90.0133	112.517	22.418					8	CK2-Root		0.251	8.09239	10.1155	1.98599
		9	CK3-Root	0.2503	91.8041	114.755	22.8741					9	CK3-Root		0.2502	8.76018	10.9502	2.15916
		10	CK4-Root	0.2507	96.6163	120.77	24.0373					10	CK4-Root		0.2508	8.60279	10.7535	2.11477
	AgNO3	11	1~1	0.2507	6.44258	8.05323	1.55685				AgNO3	11	1~1		0.2503	4.53425	5.66781	1.10308
		12	1~2	0.2501	5.63672	7.0459	1.3592					12	1~2		0.2504	5.35089	6.68861	1.30647
		13	1~3	0.2507	5.84901	7.31127	1.40887					13	1~3		0.2508	4.15637	5.19546	1.00671
		14	1~4	0.2509	7.25773	9.07216	1.75866					14	1~4		0.2509	6.24405	7.80506	1.52636
	TEACl	15	2~1	0.2501	85.6249	107.031	21.3483				TEACl	15	2~1		0.2505	5.143	6.42875	1.25408
		16	2~2	0.2502	85.2852	106.606	21.2548					16	2~2		0.2501	4.80538	6.00672	1.17172
		17	2~3	0.251	93.759	117.199	23.2971					17	2~3		0.2509	4.58454	5.73068	1.11297
		18	2~4	0.2511	80.5548	100.693	20.0013					18	2~4		0.2507	4.42607	5.53259	1.07435
	CoCl2	19	3~1	0.2504	74.931	93.6638	18.6535				CoCl2	19	3~1		0.2501	9.10146	11.3768	2.24531
		20	3~2	0.2503	79.5185	99.3981	19.8064					20	3~2		0.2508	11.3414	14.1767	2.79723
		21	3~3	0.2504	82.0085	102.511	20.42					21	3~3		0.2503	9.05856	11.3232	2.2328
		22	3~4	0.2505	79.9976	99.9969	19.9101					22	3~4		0.2504	10.868	13.585	2.68355
	DIDS	23	4~1	0.2508	71.6646	89.5808	17.8097				DIDS	23	4~1		0.2502	8.58829	10.7354	2.11622
		24	4~2	0.251	87.9734	109.967	21.8565					24	4~2		0.2505	10.2937	12.8672	2.5392
		25	4~3	0.2508	84.0186	105.023	20.8884					25	4~3		0.2505	9.3976	11.747	2.31561
		26	4~4	0.2508	118.506	148.132	29.4827					26	4~4		0.251	13.3275	16.6594	3.28956
	CCCP	27	5~1	0.2503	81.1749	101.469	20.22				CCCP	27	5~1		0.2504	6.25788	7.82234	1.53286
		28	5~2	0.25	78.8755	98.5944	19.6694					28	5~2		0.2506	6.36185	7.95232	1.55757
		29	5~3	0.2508	83.0559	103.82	20.6485					29	5~3		0.2507	5.38363	6.72953	1.31307
		30	5~4	0.2507	87.4679	109.335	21.7566					30	5~4		0.2505	6.11208	7.6401	1.49587
	Ethanol	31	6~1	0.2505	81.1584	101.448	20.1998				Ethanol	31	6~1		0.2506	8.36528	10.4566	2.05722
		32	6~2	0.2507	83.1032	103.879	20.6685					32	6~2		0.2503	7.97316	9.96646	1.96178
		33	6~3	0.2505	83.9818	104.977	20.9042					33	6~3		0.251	7.84994	9.81242	1.92562
		34	6~4	0.2503	93.0708	116.338	23.1904					34	6~4		0.2505	7.55922	9.44903	1.85693
			No.	weight (g)	con.(μg/L)	*1.25	con.(mg/kg）						No.		weight (g)	con.(μg/L)	*1.25	con.(mg/kg）
		1	Blank-1		0.0843394	0.105424	0.107723					1	Blank-1				0	0.0847641
		2	Blank-2		0.101787	0.127234						2	Blank-2			0.0534809	0.0668511
		3	Blank-3		0.0705697	0.0882121						3	Blank-3			0.0821416	0.102677
	SeMet	13	CK1-shoot	0.2506	4.69791	5.87238	1.15017				SeOMet	13	CK1-shoot		0.2501	2.10111	2.62639	0.508121
		14	CK2-shoot	0.2501	3.84346	4.80432	0.938944					14	CK2-shoot		0.2505	2.08635	2.60794	0.503628
		15	CK3-shoot	0.2502	5.19809	6.49762	1.27696					15	CK3-shoot		0.2508	2.04141	2.55176	0.491826
		16	CK4-shoot	0.2501	6.35009	7.93762	1.56535					16	CK4-shoot		0.2502	2.01562	2.51953	0.486563
	AgNO3	17	1~1	0.25	0	0	0.01				AgNO3	17	1~1		0.2506	2.0145	2.51812	0.485507
		18	1~2	0.2503	0	0	0.01					18	1~2		0.251	1.98781	2.48476	0.478088
		19	1~3	0.251	0	0	0.01					19	1~3		0.2507	2.02706	2.53382	0.488444
		20	1~4	0.2507	0	0	0.01					20	1~4		0.2505	2.08801	2.61001	0.504042
	TEACl	21	2~1	0.2507	1.31083	1.63853	0.305307				TEACl	21	2~1		0.251	1.93888	2.4236	0.465903
		22	2~2	0.25	1.94001	2.42501	0.463457					22	2~2		0.2503	1.89124	2.36406	0.455312
		23	2~3	0.2506	2.21641	2.77051	0.531282					23	2~3		0.2501	1.87218	2.34023	0.450912
		24	2~4	0.2507	2.44401	3.05502	0.587813					24	2~4		0.2506	1.89026	2.36282	0.454521
	CoCl2	25	3~1	0.2503	1.97831	2.47289	0.472467				CoCl2	25	3~1		0.2501	1.96974	2.46217	0.475291
		26	3~2	0.251	0.788238	0.985297	0.174816					26	3~2		0.2505	1.92991	2.41238	0.464595
		27	3~3	0.2501	0.627094	0.783868	0.135175					27	3~3		0.2504	1.86541	2.33176	0.448682
		28	3~4	0.2507	1.61818	2.02272	0.38193					28	3~4		0.2501	1.89416	2.3677	0.456404
	DIDS	29	4~1	0.2501	5.49165	6.86457	1.35083				DIDS	29	4~1		0.2504	1.96803	2.46004	0.474296
		30	4~2	0.2503	6.00062	7.50077	1.47684					30	4~2		0.25	2.01961	2.52452	0.48795
		31	4~3	0.2501	8.57189	10.7149	2.12058					31	4~3		0.2504	1.99185	2.48981	0.480241
		32	4~4	0.2508	4.51527	5.64409	1.10374					32	4~4		0.2501	2.03051	2.53814	0.490479
	CCCP	33	5~1	0.2502	4.26629	5.33286	1.04419				CCCP	33	5~1		0.2504	1.9217	2.40212	0.462732
		34	5~2	0.2505	4.18113	5.22641	1.0217					34	5~2		0.2506	1.96687	2.45858	0.473627
		35	5~3	0.2505	8.25354	10.3169	2.03777					35	5~3		0.2505	1.93829	2.42287	0.466687
		36	5~4	0.2505	10.0348	12.5435	2.48219					36	5~4		0.2506	1.84406	2.30507	0.442999
	Ethanol	37	6~1	0.2507	6.57092	8.21365	1.61666				Ethanol	37	6~1		0.2503	1.88797	2.35996	0.454494
		38	6~2	0.2502	8.1946	10.2433	2.02549					38	6~2		0.2501	1.93305	2.41631	0.466123
		39	6~3	0.25	4.55159	5.68948	1.11635					39	6~3		0.2505	1.94731	2.43414	0.468937
		40	6~4	0.2503	5.70022	7.12528	1.40183					40	6~4		0.2504	1.96525	2.45656	0.473602
	SeMet	mg/kg	g	μg	mg/kg	g	μg	μg	μg Se/g root (DW)
		Root	biomass	r-Total	Shoot	biomass	S-Total	Total-plant	uptake rate
	CK	19.3972	0.41	7.95286	1.15017	0.96	1.10416	9.05703	22.0903
		22.418	0.36	8.07049	0.938944	0.82	0.769934	8.84042	24.5567
		22.8741	0.49	11.2083	1.27696	1.08	1.37911	12.5874	25.6887
		24.0373	0.34	8.17269	1.56535	0.76	1.18967	9.36236	27.5363
	AgNO3	1.55685	0.43	0.669445	0.01	1.02	0.0102	0.679645	1.58057
		1.3592	0.39	0.530088	0.01	0.82	0.0082	0.538288	1.38023
		1.40887	0.36	0.507194	0.01	0.78	0.0078	0.514994	1.43054
		1.75866	0.39	0.685879	0.01	0.87	0.0087	0.694579	1.78097
	TEACl	21.3483	0.41	8.75279	0.305307	0.88	0.26867	9.02146	22.0036
		21.2548	0.44	9.35213	0.463457	1.01	0.468092	9.82022	22.3187
		23.2971	0.41	9.55182	0.531282	0.9	0.478154	10.03	24.4633
		20.0013	0.4	8.0005	0.587813	0.88	0.517276	8.51778	21.2944
	CoCl2	18.6535	0.39	7.27486	0.472467	0.89	0.420495	7.69535	19.7317
		19.8064	0.42	8.31869	0.174816	0.89	0.155586	8.47428	20.1769
		20.42	0.47	9.59741	0.135175	0.95	0.120306	9.71771	20.676
		19.9101	0.37	7.36675	0.38193	0.83	0.362834	7.72958	20.8908
	DIDS	17.8097	0.4	7.12389	1.35083	0.87	1.12119	8.24508	20.6127
		21.8565	0.4	8.7426	1.47684	0.93	1.28485	10.0274	25.0686
		20.8884	0.38	7.93758	2.12058	0.86	1.97214	9.90972	26.0782
		29.4827	0.35	10.3189	1.10374	0.82	0.949218	11.2682	32.1948
	CCCP	20.22	0.4	8.08801	1.04419	0.97	0.856238	8.94425	22.3606
		19.6694	0.39	7.67108	1.0217	0.78	0.991044	8.66212	22.2106
		20.6485	0.43	8.87884	2.03777	0.98	1.58946	10.4683	24.3449
		21.7566	0.36	7.83239	2.48219	0.85	2.43254	10.2649	28.5137
	Ethanol	20.1998	0.37	7.47391	1.61666	0.85	1.37416	8.84807	23.9137
		20.6685	0.32	6.61392	2.02549	0.71	1.72166	8.33558	26.0487
		20.9042	0.4	8.36169	1.11635	0.88	0.79261	9.15429	22.8857
		23.1904	0.44	10.2038	1.40183	0.91	1.23361	11.4374	25.9941
	SeOMet	mg/kg	g	μg	mg/kg	g	μg	μg	μg Se/g root (DW)
		Root	biomass	r-Total	Shoot	biomass	S-Total	Total-plant	uptake rate
	CK	2.23153	0.37	0.825666	0	0.86	0	0.825666	2.23153
		1.98599	0.44	0.873838	0	0.96	0	0.873838	1.98599
		2.15916	0.46	0.993213	0	0.97	0	0.993213	2.15916
		2.11477	0.38	0.803613	0	0.91	0	0.803613	2.11477
	AgNO3	1.10308	0.43	0.474324	0	0.92	0	0.474324	1.10308
		1.30647	0.44	0.574847	0	0.94	0	0.574847	1.30647
		1.00671	0.37	0.372483	0	0.88	0	0.372483	1.00671
		1.52636	0.37	0.564752	0	0.87	0	0.564752	1.52636
	TEACl	1.25408	0.44	0.551796	0	0.97	0	0.551796	1.25408
		1.17172	0.4	0.468686	0	0.88	0	0.468686	1.17172
		1.11297	0.42	0.467447	0	0.89	0	0.467447	1.11297
		1.07435	0.42	0.451227	0	0.93	0	0.451227	1.07435
	CoCl2	2.24531	0.39	0.87567	0	0.85	0	0.87567	2.24531
		2.2328	0.4	0.89312	0	1.01	0	0.89312	2.2328
		2.68355	0.4	1.07342	0	0.88	0	1.07342	2.68355
		2.38722	0.34	0.811654	0	0.72	0	0.811654	2.38722
	DIDS	2.11622	0.46	0.973461	0	0.95	0	0.973461	2.11622
		2.5392	0.4	1.01568	0	0.88	0	1.01568	2.5392
		2.31561	0.39	0.903088	0	0.85	0	0.903088	2.31561
		2.32368	0.46	1.06889	0	1.04	0	1.06889	2.32368
	CCCP	1.53286	0.42	0.6438	0	0.93	0	0.6438	1.53286
		1.55757	0.44	0.685329	0	0.99	0	0.685329	1.55757
		1.31307	0.36	0.472705	0	0.82	0	0.472705	1.31307
		1.49587	0.4	0.598347	0	0.85	0	0.598347	1.49587
	Ethanol	2.05722	0.35	0.720028	0	0.79	0	0.720028	2.05722
		1.96178	0.38	0.745475	0	0.85	0	0.745475	1.96178
		1.92562	0.47	0.905042	0	1.05	0	0.905042	1.92562
		1.85693	0.39	0.724203	0	0.94	0	0.724203	1.85693

## Sheet: P、S
			Root
			No.	weight (g)	con.(μg/L)	*1.25	con.(mg/kg）
		1	Blank-1		0.218179	0.272724	0.283862
		2	Blank-2		0.305642	0.382052
		3	Blank-3		0.157449	0.196811
		7	root-Met-S-1	0.2504	367.047	458.809	91.5585
		8	Met-S-2	0.25	361.804	452.255	90.3942
		9	Met-S-3	0.2508	409.162	511.452	101.908
		10	Met-S-4	0.2508	333.674	417.092	83.0958
		11	Met-P-1	0.2505	409.468	511.835	102.106
		12	Met-P-2	0.2506	391.16	488.95	97.4992
		13	Met-P-3	0.2505	399.818	499.772	99.6983
		14	Met-P-4	0.2502	412.278	515.347	102.93
		15	Met-N-1	0.2505	396.532	495.665	98.8784
		16	Met-N-2	0.2505	395.018	493.772	98.5006
		17	Met-N-3	0.2509	416.679	520.848	103.739
		18	Met-N-4	0.2508	354.747	443.434	88.3473
		19	OMet-S-1	0.2502	378.848	473.56	94.5796
		20	OMet-S-2	0.251	409.932	512.415	102.018
		21	OMet-S-3	0.2508	322.84	403.55	80.3961
		22	OMet-S-4	0.2501	358.596	448.245	89.5564
		23	OMet-P-1	0.2504	361.363	451.704	90.1398
		24	OMet-P-2	0.2505	341.006	426.257	85.0247
		25	OMet-P-3	0.2504	358.725	448.406	89.4812
		26	OMet-P-4	0.2505	338.85	423.563	84.4869
		27	OMet-N-1	0.2509	387.217	484.022	96.4006
		28	OMet-N-2	0.2506	367.322	459.152	91.5539
		29	OMet-N-3	0.2507	421.702	527.128	105.075
		30	OMet-N-4	0.2507	356.127	445.159	88.7266
			Shoot
			No.	weight (g)	con.(μg/L)	*1.25	con.(mg/kg）
		1	Blank-1		0.15866	0.198325	0.200399
		2	Blank-2		0.125245	0.156556
		3	Blank-3		0.197054	0.246317
		7	shoot-Met-S-1	0.2504	88.5176	110.647	22.054
		8	Met-S-2	0.2506	82.604	103.255	20.5616
		9	Met-S-3	0.2508	102.679	128.349	25.548
		10	Met-S-4	0.2503	73.7514	92.1892	18.3757
		11	Met-P-1	0.2503	67.2211	84.0263	16.7451
		12	Met-P-2	0.2507	82.9647	103.706	20.6433
		13	Met-P-3	0.251	68.0572	85.0715	16.9066
		14	Met-P-4	0.2504	78.2764	97.8455	19.4978
		15	Met-N-1	0.2508	99.8889	124.861	24.8526
		16	Met-N-2	0.2503	69.5473	86.9342	17.326
		17	Met-N-3	0.251	67.2228	84.0285	16.6988
		18	Met-N-4	0.251	89.0581	111.323	22.1359
		19	OMet-S-1	0.2501	79.6316	99.5395	19.8599
		20	OMet-S-2	0.2506	83.4979	104.372	20.7845
		21	OMet-S-3	0.2502	82.6989	103.374	20.6182
		22	OMet-S-4	0.25	63.4075	79.2593	15.8118
		23	OMet-P-1	0.2505	67.0204	83.7755	16.6817
		24	OMet-P-2	0.2504	54.752	68.44	13.6261
		25	OMet-P-3	0.2507	55.6189	69.5236	13.8259
		26	OMet-P-4	0.2502	58.9597	73.6996	14.6881
		27	OMet-N-1	0.2502	76.2571	95.3213	19.009
		28	OMet-N-2	0.2507	60.0113	75.0141	14.921
		29	OMet-N-3	0.2509	60.7599	75.9498	15.0955
		30	OMet-N-4	0.2505	73.7207	92.1509	18.3534
			mg/kg	g	μg	mg/kg	g	μg	μg	μg Se/g root (DW)
			Root-biomass	Root-con.	r-Total	Shoot-biomass	Shoot-con.	S-Total	Total-plant	uptake rate
		Met-S-1	1.46	91.5585	133.675	2.95	22.054	65.0594	198.735	136.12
		Met-S-2	1.44	90.3942	130.168	2.73	20.5616	56.1331	186.301	129.375
		Met-S-3	1.44	101.908	146.747	2.99	25.548	76.3885	223.135	154.955
		Met-S-4	1.3	83.0958	108.025	2.55	18.3757	46.8581	154.883	119.14
		Met-P-1	1.4	102.106	142.949	2.85	16.7451	47.7235	190.672	136.194
		Met-P-2	1.47	97.4992	143.324	3.25	20.6433	67.0907	210.414	143.139
		Met-P-3	1.35	99.6983	134.593	2.61	16.9066	44.1262	178.719	132.384
		Met-P-4	1.54	102.93	158.513	3.03	19.4978	59.0784	217.591	141.293
		Met-N-1	1.37	98.8784	135.463	3.05	24.8526	75.8005	211.264	154.207
		Met-N-2	1.36	98.5006	133.961	3.05	17.326	52.8442	186.805	137.357
		Met-N-3	1.3	103.739	134.861	2.61	16.6988	43.5839	178.445	137.266
		Met-N-4	1.37	88.3473	121.036	2.82	22.1359	62.4232	183.459	133.912
		OMet-S-1	1.59	94.5796	150.382	3.17	19.8599	62.9558	213.337	134.174
		OMet-S-2	1.51	102.018	154.048	3.21	20.7845	66.7183	220.766	146.203
		OMet-S-3	1.38	80.3961	110.947	2.72	20.6182	56.0814	167.028	121.035
		OMet-S-4	1.3	89.5564	116.423	2.65	15.8118	41.9012	158.325	121.788
		OMet-P-1	1.44	90.1398	129.801	2.98	16.6817	49.7113	179.513	124.662
		OMet-P-2	1.37	85.0247	116.484	2.69	13.6261	36.6543	153.138	111.78
		OMet-P-3	1.33	89.4812	119.01	2.73	13.8259	37.7448	156.755	117.861
		OMet-P-4	1.57	84.4869	132.644	3.05	14.6881	44.7987	177.443	113.021
		OMet-N-1	1.11	96.4006	107.005	2.53	19.009	48.0927	155.097	139.727
		OMet-N-2	1.41	91.5539	129.091	3	14.921	44.7629	173.854	123.301
		OMet-N-3	1.55	105.075	162.866	3.22	15.0955	48.6077	211.473	136.434
		OMet-N-4	1.48	88.7266	131.315	2.96	18.3534	54.326	185.641	125.433

## Sheet: Interaction
			No.	weight (g)	con.(μg/L)	*1.25	con.(mg/kg）
		1	Blank-1		0.119432	0.14929	0.15504
		2	Blank-2		0.114966	0.143707
		3	Blank-3		0.137699	0.172124
		7	Met-1-Shoot	0.2502	2.20228	2.75285	0.519147
		8	Met-2-Shoot	0.2502	1.26465	1.58082	0.284927
		9	Met-3-Shoot	0.2508	0.977936	1.22242	0.212795
		10	Met-4-Shoot	0.2502	1.53964	1.92456	0.35362
		11	OMet-1	0.2504	0	0	0
		12	OMet-2	0.2506	0	0	0
		13	OMet-3	0.2502	0	0	0
		14	OMet-4	0.2506	0	0	0
		15	O/M-1	0.2505	0	0	0
		16	O/M-2	0.2502	0	0	0
		17	O/M-3	0.2503	0	0	0
		18	O/M-4	0.2501	0	0	0
		19	Met-1-Root	0.2507	96.8979	121.122	24.1259
		20	Met-2-Root	0.2505	94.8716	118.59	23.6396
		21	Met-3-Root	0.2504	88.6703	110.838	22.1012
		22	Met-4-Root	0.2503	88.4506	110.563	22.0552
		23	OMet-1	0.2507	8.87534	11.0942	2.18172
		24	OMet-2	0.251	6.49464	8.1183	1.58631
		25	OMet-3	0.2503	8.31465	10.3933	2.0452
		26	OMet-4	0.2505	7.8052	9.7565	1.91646
		27	O/M-1	0.2505	8.24768	10.3096	2.02686
		28	O/M-2	0.25	8.01987	10.0248	1.97396
		29	O/M-3	0.2505	9.36276	11.7035	2.30507
		30	O/M-4	0.2502	8.20301	10.2538	2.01813
			mg/kg	g	μg	mg/kg	g	μg	μg	%
		Met	Root	biomass	r-Total	Shoot	biomass	S-Total	Total-plant	Shhot%
			24.1259	0.36	8.68533	2.75285	0.82	2.25734	10.9427	0.206288
			23.6396	0.33	7.80107	1.58082	0.85	1.34369	9.14477	0.146936
			22.1012	0.32	7.07239	1.22242	0.92	1.12463	8.19701	0.1372
			22.0552	0.33	7.27821	1.92456	0.86	1.65512	8.93332	0.185275
		OMet	2.18172	0.35	0.763602	0	0.96	0	0.763602	0
			1.58631	0.36	0.57107	0	0.92	0	0.57107	0
			2.0452	0.41	0.838532	0	1.04	0	0.838532	0
			1.91646	0.38	0.728255	0	0.92	0	0.728255	0
		O/M	2.02686	0.32	0.648595	0	0.78	0	0.648595	0
			1.97396	0.43	0.848802	0	0.99	0	0.848802	0
			2.30507	0.35	0.806775	0	0.86	0	0.806775	0
			2.01813	0.34	0.686165	0	0.87	0	0.686165	0
			mg/kg	g	μg	mg/kg	g	μg	μg	μg Se/g root (DW)
			Root	biomass	r-Total	Shoot	biomass	S-Total	Total-plant	uptake rate
		Met	24.1259	0.36	8.68533	2.75285	0.82	2.25734	10.9427	30.3963
			23.6396	0.33	7.80107	1.58082	0.85	1.34369	9.14477	27.7114
			22.1012	0.32	7.07239	1.22242	0.92	1.12463	8.19701	25.6157
			22.0552	0.33	7.27821	1.92456	0.86	1.65512	8.93332	27.0707
		Omet	2.18172	0.35	0.763602	0	0.96	0	0.763602	2.18172
			1.58631	0.36	0.57107	0	0.92	0	0.57107	1.58631
			2.0452	0.41	0.838532	0	1.04	0	0.838532	2.0452
			1.91646	0.38	0.728255	0	0.92	0	0.728255	1.91646
		O/M	2.02686	0.32	0.648595	0	0.78	0	0.648595	2.02686
			1.97396	0.43	0.848802	0	0.99	0	0.848802	1.97396
			2.30507	0.35	0.806775	0	0.86	0	0.806775	2.30507
			2.01813	0.34	0.686165	0	0.87	0	0.686165	2.01813
